# Supplementary material for: Remission of lymphoblastic leukaemia in an intravascular fluidic environment by pliable drug carrier with a sliding target ligand
Source: PubMed Central journal article supplement (PMC5240144; doi:10.1038/srep40739), 2017-01-17
Supplement: srep40739-s1.pdf [file srep40739-s1.pdf]

# Supporting Information

Remission of lymphoblastic leukaemia in an intravascular fluidic environment by pliable drug carrier with a sliding target ligand

Donghyun Jang<sup>1,2</sup>, Yeong Mi Lee<sup>1,2</sup>, Jaehyun Lee<sup>3</sup>, Junsang Doh<sup>3,4</sup> and Won Jong Kim<sup>1,2,\*</sup>

<sup>1</sup> Center for Self-Assembly and Complexity, Institute for Basic Science (IBS), Pohang 37673, Republic of Korea

<sup>2</sup> Department of Chemistry, Pohang University of Science and Technology (POSTECH), Pohang 37673, Republic of Korea

<sup>3</sup> School of Interdisciplinary Bioscience and Bioengineering (I-Bio), Pohang University of Science and Technology (POSTECH), Pohang, 37673, Republic of Korea

<sup>4</sup> Department of Mechanical Engineering, Pohang University of Science and Technology (POSTECH), Pohang, 37673, Republic of Korea

## Contents

### **1. Supplementary Figures .....S3**

#### **Supplementary Figure 1**

Synthetic schemes of DNA-CD and PRs.....S3

#### **Supplementary Figure 2**

Confirmation of  $\alpha$ CD-SH by <sup>1</sup>H NMR spectroscopy.....S4

#### **Supplementary Figure 3**

HPLC data of DNA-CD.....S4

#### **Supplementary Figure 4**

GPC data of PEG and PRs.....S5

#### **Supplementary Figure 5**

DLS size measurement of various PRNCs.....S6

#### **Supplementary Figure 6**

Serum stability of PRNC.....S6

|                                                                               |            |
|-------------------------------------------------------------------------------|------------|
| <b>Supplementary Figure 7</b>                                                 |            |
| TEM image of various PRNCs.....                                               | S7         |
| <b>Supplementary Figure 8</b>                                                 |            |
| CD spectra of i-motif DNA in different pH.....                                | S8         |
| <b>Supplementary Figure 9</b>                                                 |            |
| Drug loading properties of PRNC.....                                          | S8         |
| <b>Supplementary Figure 10</b>                                                |            |
| Haemolysis test of PRNC and control groups.....                               | S9         |
| <b>Supplementary Figure 11</b>                                                |            |
| Release of DOX from S(+)/T(+)/P(-) PRNC in acidic condition .....             | S9         |
| <b>Supplementary Figure 12</b>                                                |            |
| Detailed flow cytometry data of <i>in vivo</i> targeting efficiency test..... | S10        |
| <b>Supplementary Figure 13</b>                                                |            |
| Additional images of <i>in vivo</i> cytotoxicity evaluation .....             | S11        |
| <br>                                                                          |            |
| <b>2. Supplementary Tables .....</b>                                          | <b>S12</b> |
| <br>                                                                          |            |
| <b>Supplementary Table 1</b>                                                  |            |
| Sequences of DNAs used in this experiment.....                                | S12        |
| <b>Supplementary Table 2</b>                                                  |            |
| Types of PRNCs used in this experiment.....                                   | S12        |
| <b>Supplementary Table 3</b>                                                  |            |
| IC <sub>50</sub> values of DOX and DOX loaded PRNCs.....                      | S13        |
| <b>Supplementary Table 4</b>                                                  |            |
| ROI fluorescence intensity calculation of microscopic images.....             | S13        |

# 1. Supplementary Figures

## (a) Synthesis of DNA-CD

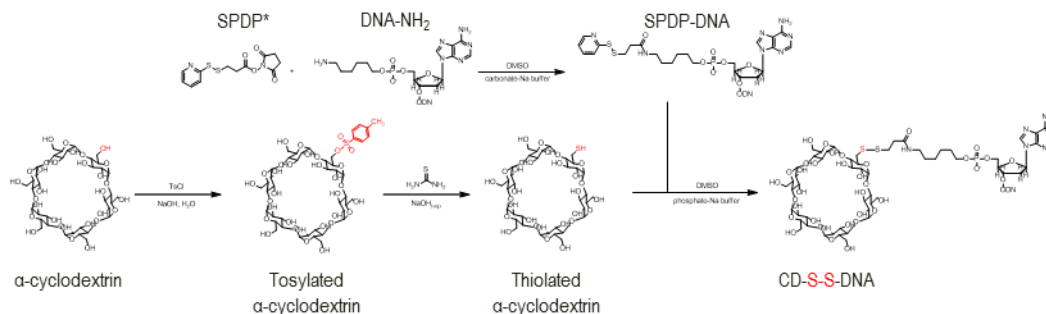

## (b) Synthesis of DNA-CD/PR structure

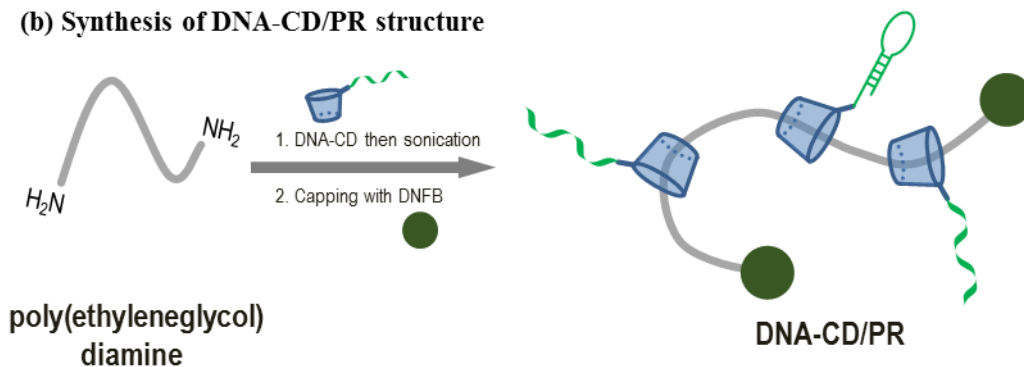

## (c) Synthesis of fluorescent DNA-CD/PR structure

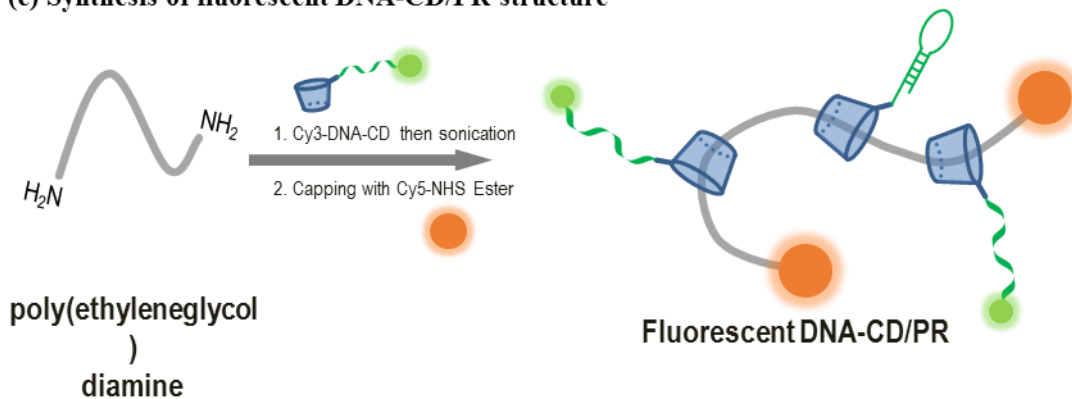

**Supplementary Figure 1** (a) Experimental schemes for synthesis of  $\alpha$ CD-SH and DNA-CD. (b) Preparation of DNA-CD/PR by capping strategy. (c) Preparation of the fluorescently labelled DNA-CD/PR.

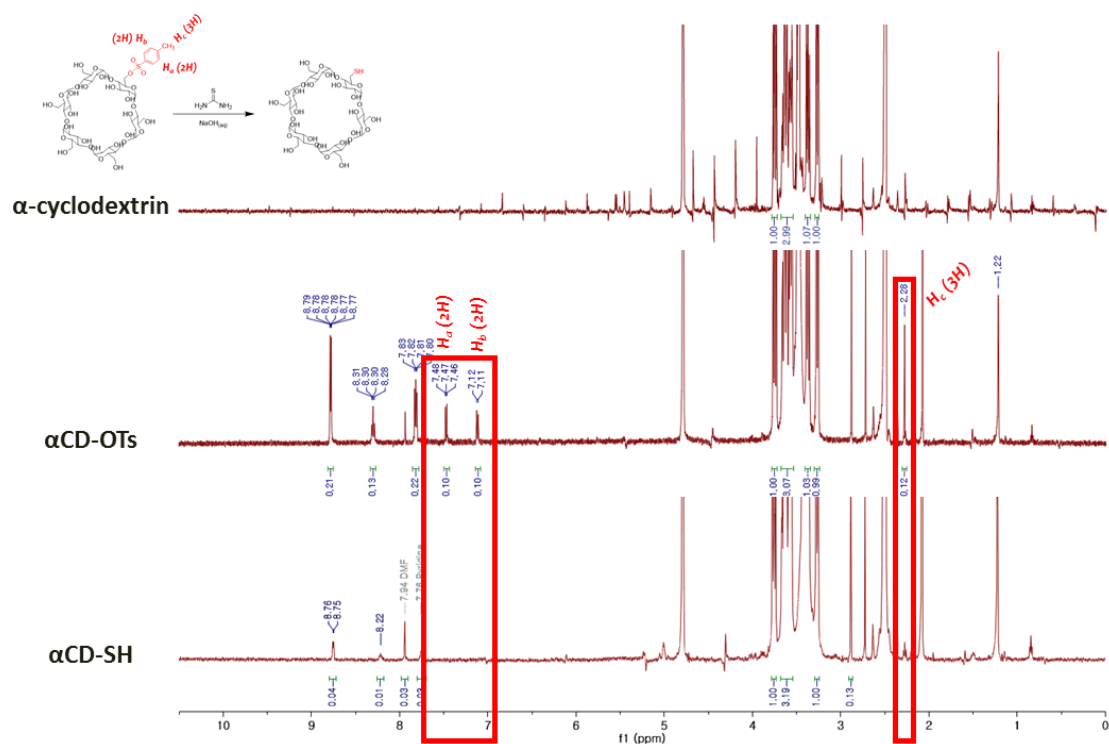

**Supplementary Figure 2** Confirmation of Mono-6-mercapto-6-deoxy- $\alpha$ -cyclodextrin by  $^1\text{H}$  NMR spectroscopy. Successful synthesis of  $\alpha\text{CD-SH}$  was confirmed by the disappeared tosylate peaks in final NMR spectra.

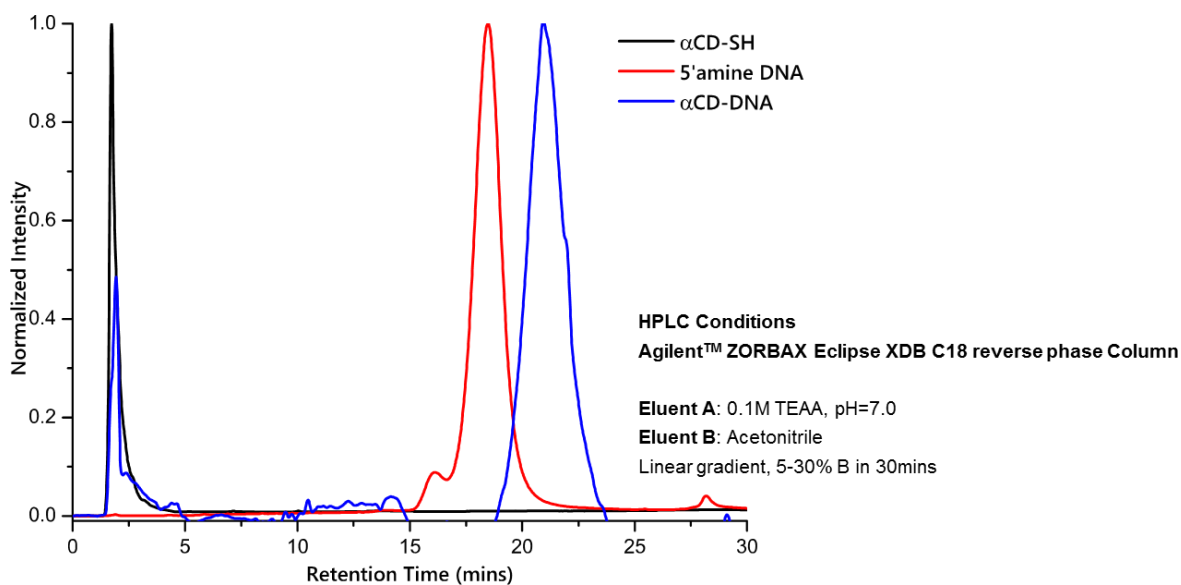

**Supplementary Figure 3** HPLC data of DNA-CD.

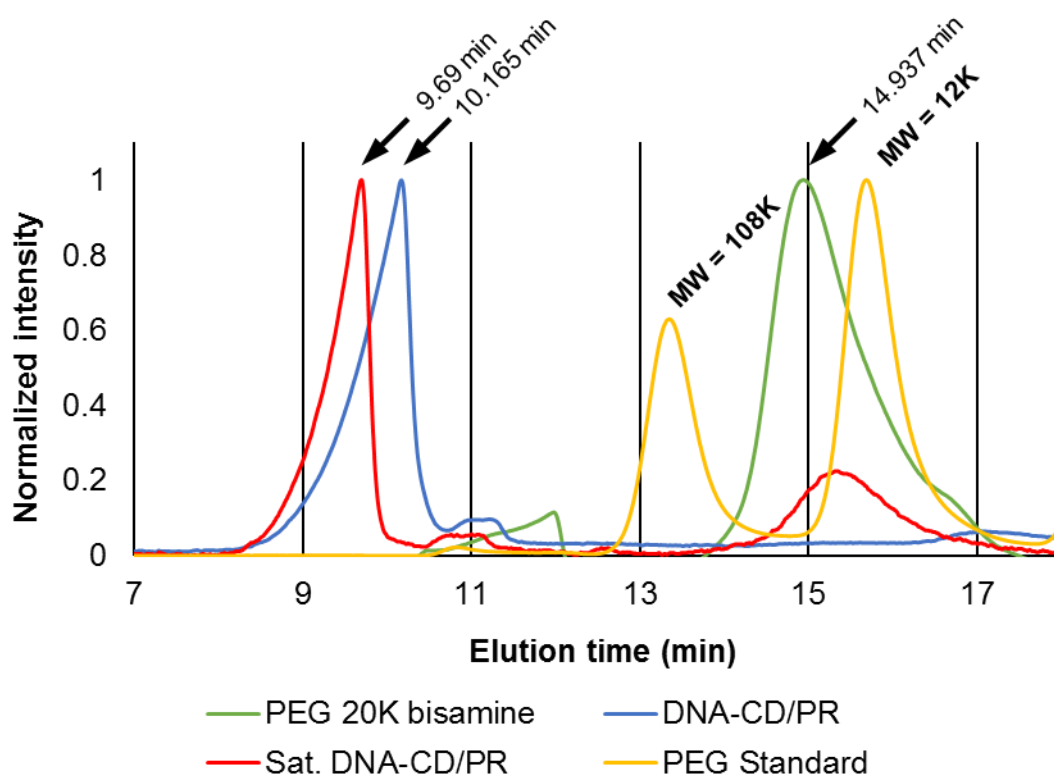

**Supplementary Figure 4** GPC data of 20K PEG-(AM)<sub>2</sub>, DNA-CD/PR and non-sliding Sat. DNA-CD/PR shown with calibration curve by PEG standards.

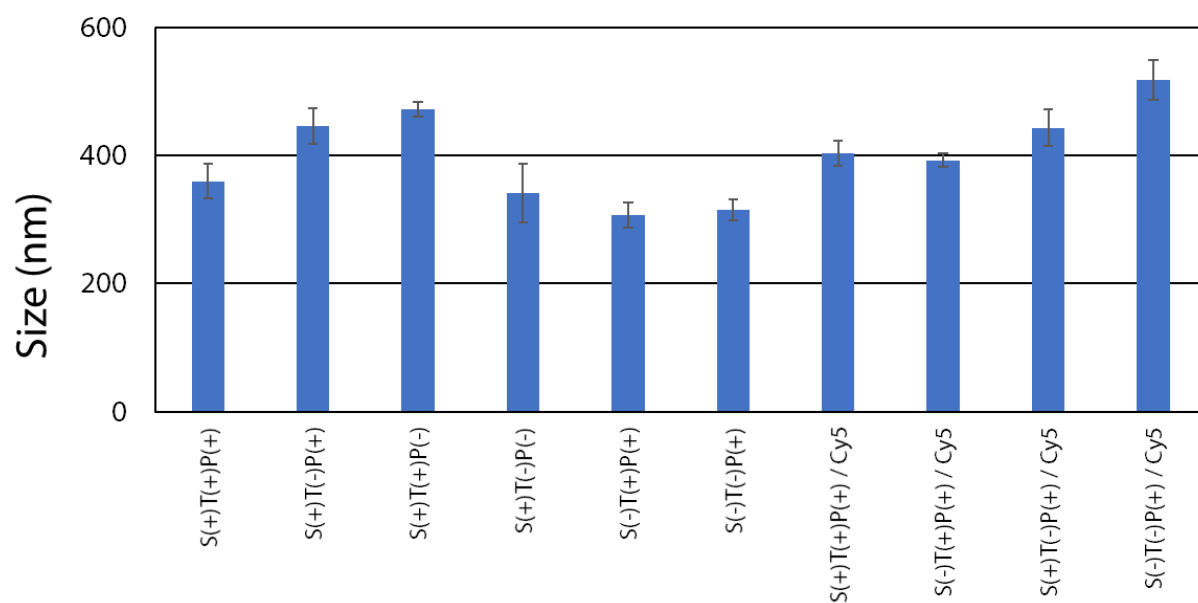

**Supplementary Figure 5** DLS size measurement of various PRNCs

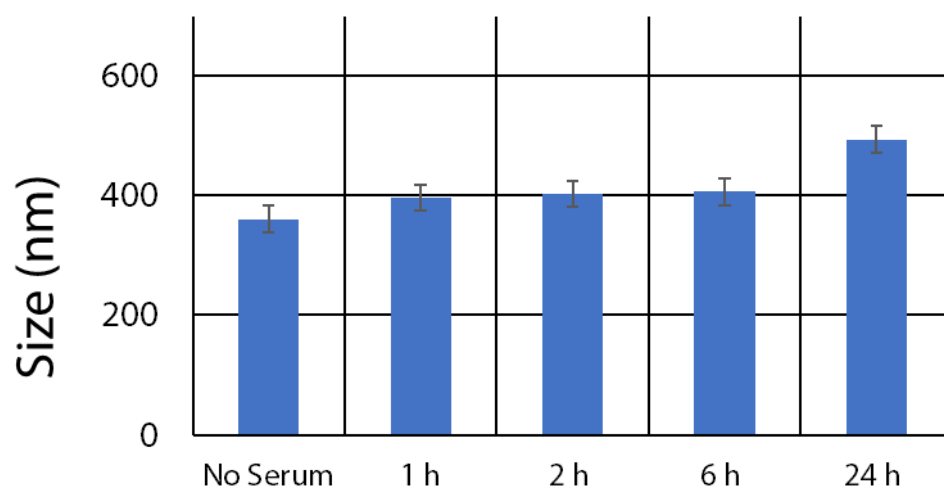

**Supplementary Figure 6** Serum stability of PRNC

**(a) S(+)  
T(+)  
P(+)**

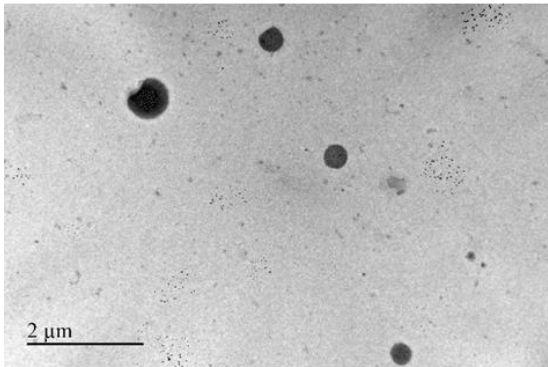

**(e) S(-)  
T(+)  
P(+)**

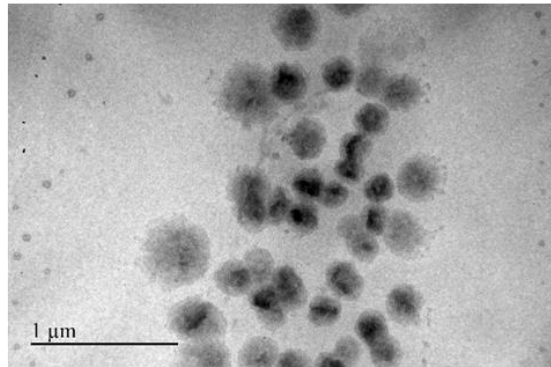

**(b) S(+)  
T(-)  
P(+)**

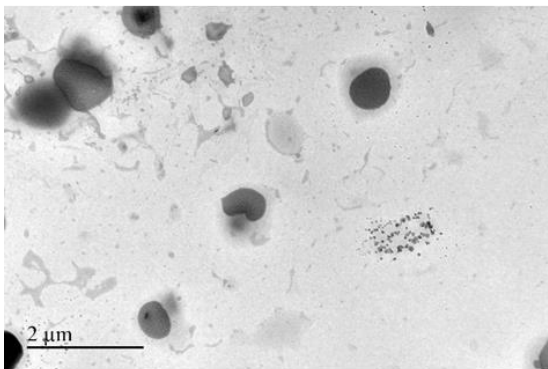

**(f) S(-)  
T(-)  
P(+)**

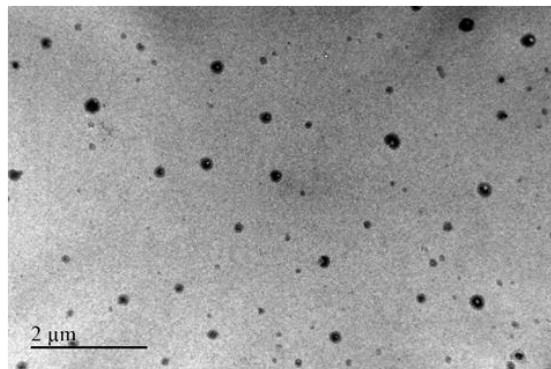

**(c) S(+)  
T(+)  
P(-)**

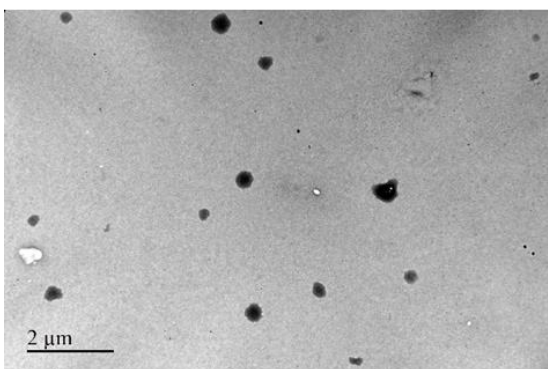

**(g) S(+)  
T(+)  
P(+)  
/ pH = 5.5**

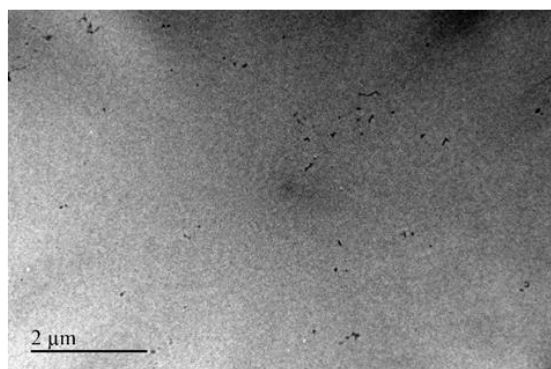

**(d) S(+)  
T(-)  
P(-)**

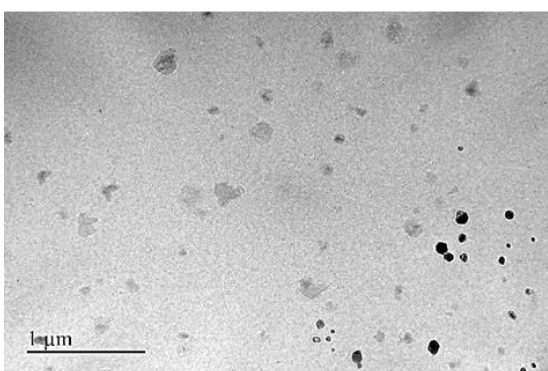

**(h) S(+)  
T(+)  
P(-)  
/ pH = 5.5**

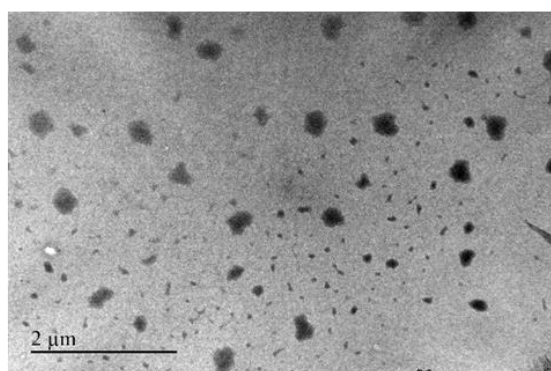

**Supplementary Figure 7** TEM image of various PRNCs

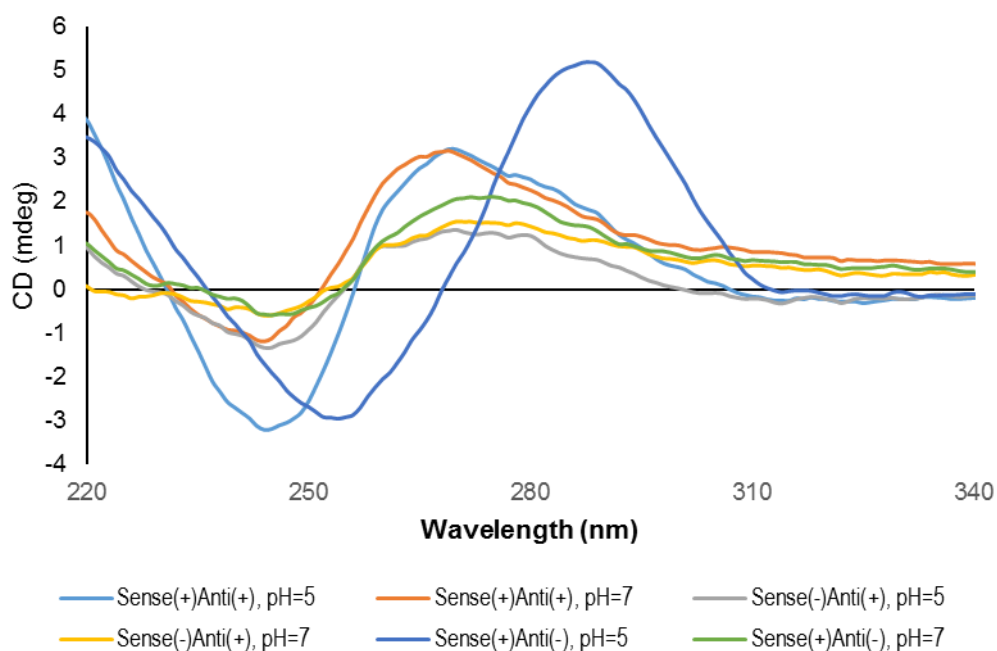

**Supplementary Figure 8** CD spectra of i-motif DNA at different pH. Characteristic peak around 240 nm indicates the formation of i-motif structure in Sense(+) Anti(+) condition.

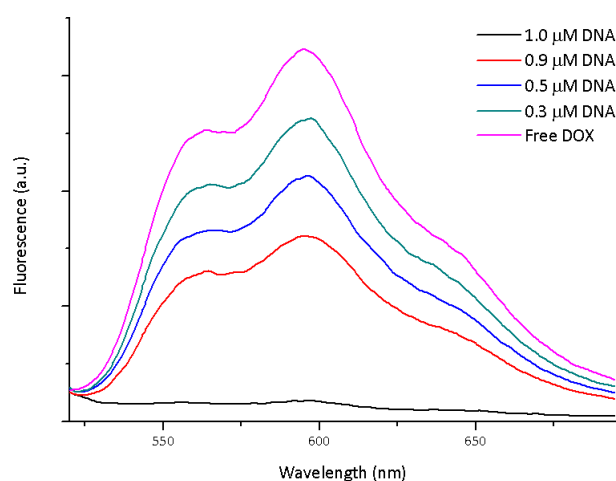

**Supplementary Figure 9** Drug loading properties of PRNC. Fluorescent spectrum shows quenching of DOX fluorescence upon intercalation within dsDNA. Maximum 5 DOX molecule is loaded in single *i-motif* dsDNA.



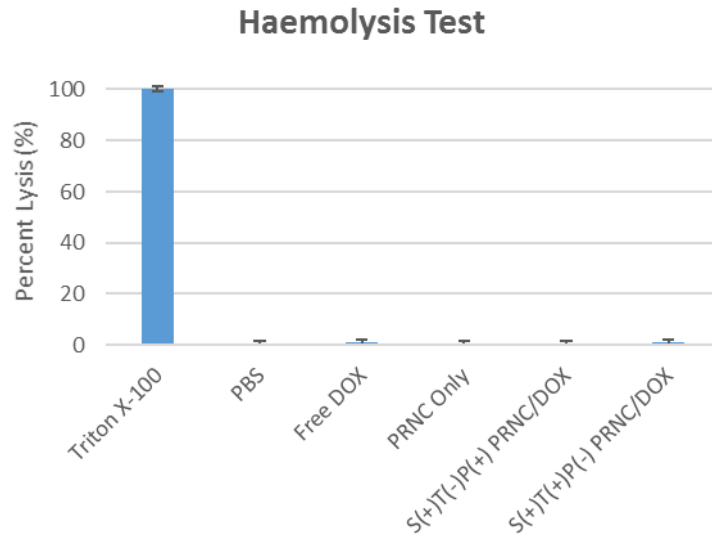

**Supplementary Figure 10** Haemolysis test of PRNC and control groups. No significant lysis of red blood cell is observed in DOX loaded PRNCs.

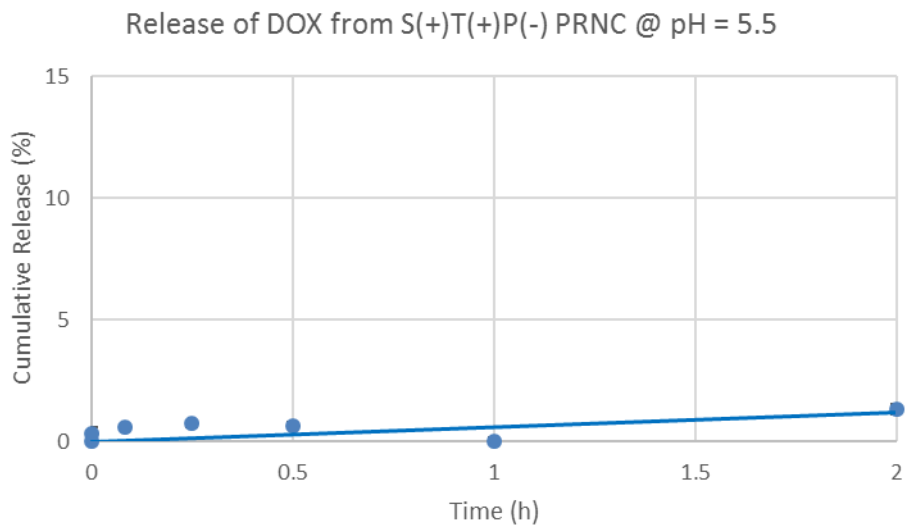

**Supplementary Figure 11** Release of DOX from non-pH responsive control groups in acidic condition

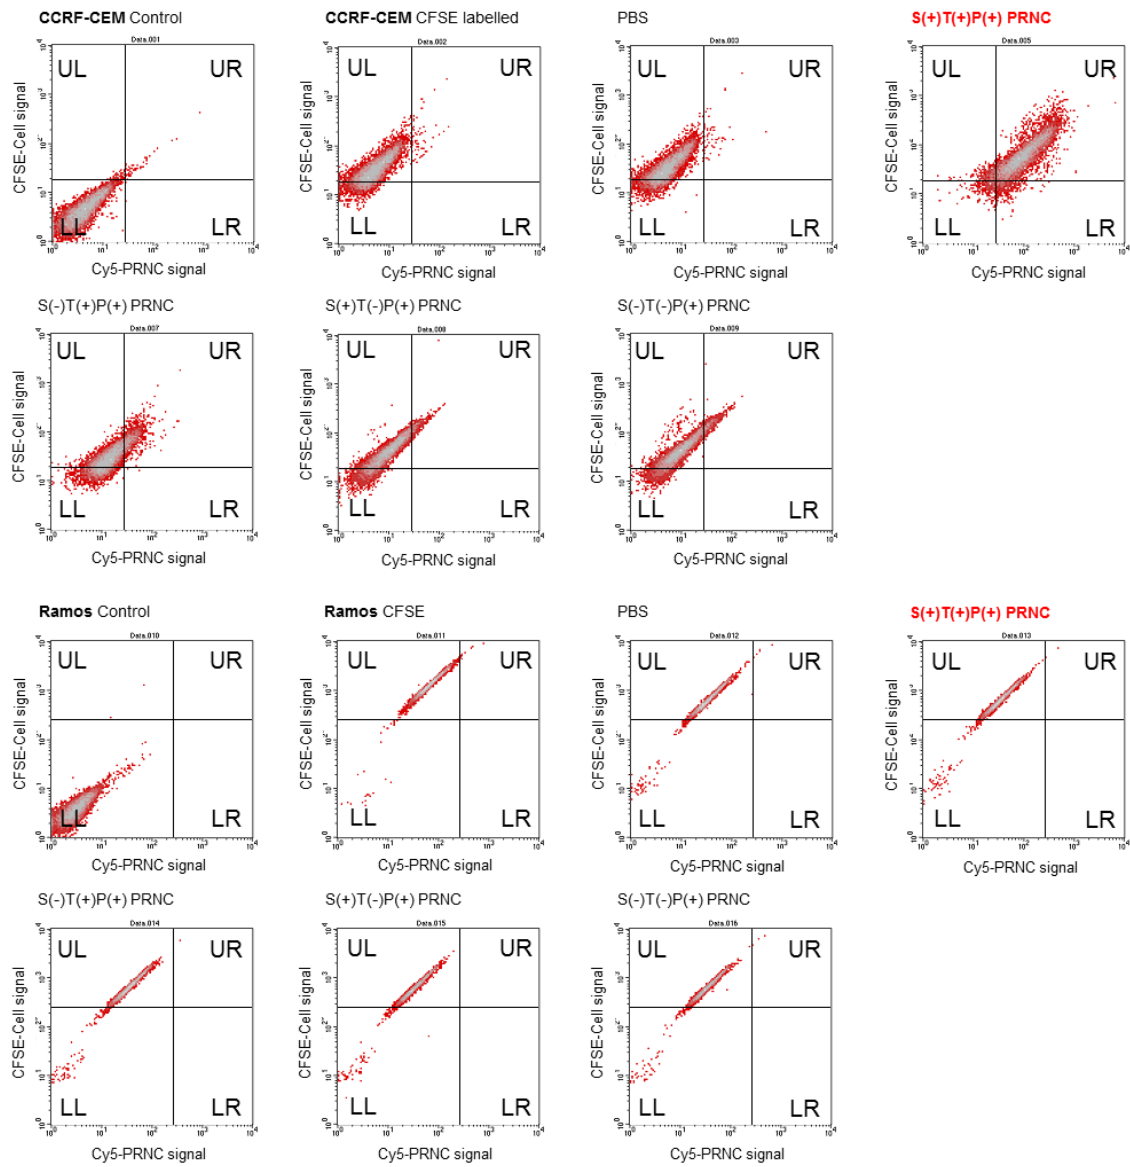

**Supplementary Figure 12** Flow cytometry analysis results of CCRF-CEM transplanted mice treated with series of PRNCs

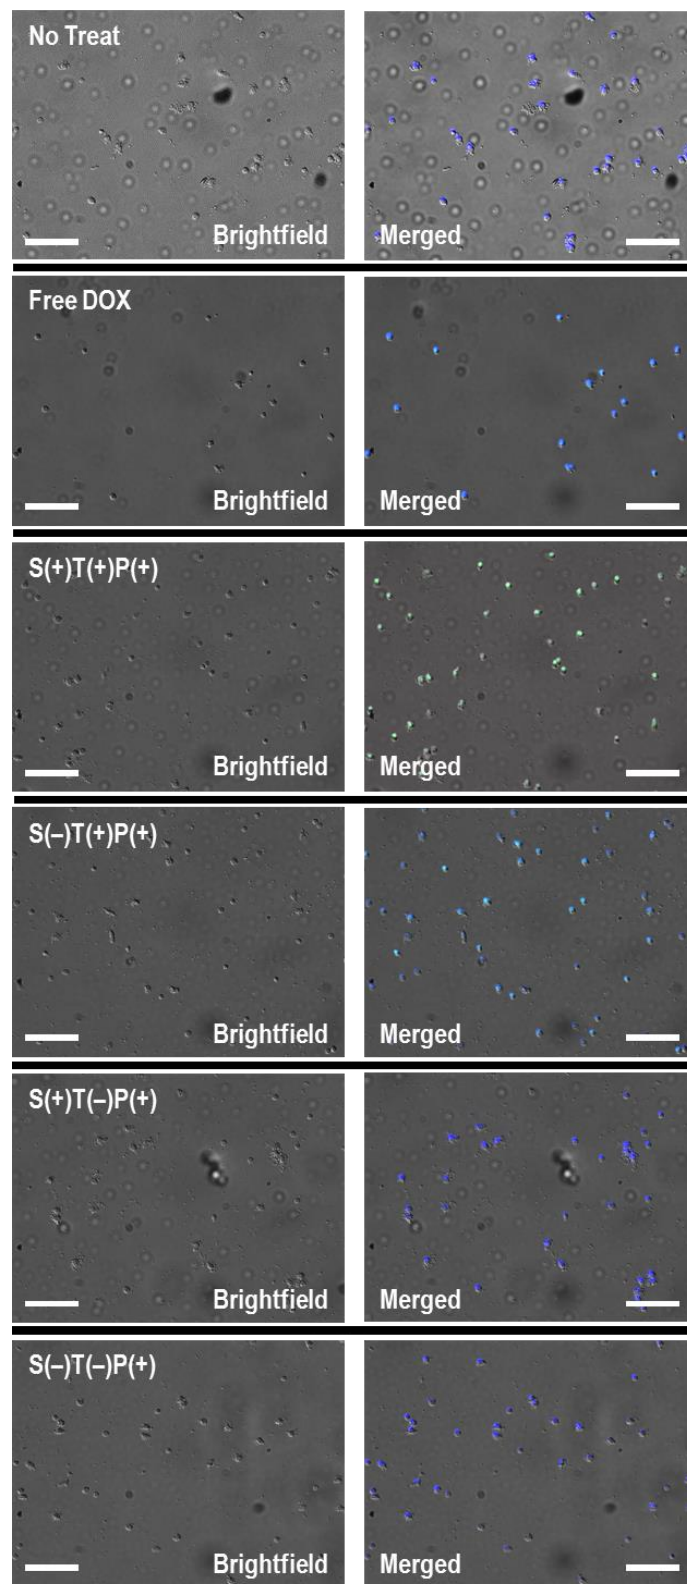

**Supplementary Figure 13** Additional images of *in vivo* cytotoxicity evaluation. Brightfield and merged images of the microscopic samples identical to **Figure 5**. (Scale bar = 100  $\mu\text{m}$ )

## 2. Supplementary Tables

**Supplementary Table 1** Sequences of DNAs used in this experiment

| Name                 | Sequence                                                                |
|----------------------|-------------------------------------------------------------------------|
| DNA <sub>i</sub>     | 5' - AAA ACC CTA ACC CTA ACC CTA ACC C - 3'                             |
| cDNA <sub>i</sub>    | 5' - AAA AGC GTT AGC GTT AGG GTT AGG G - 3'                             |
| DNA <sub>a</sub>     | 5' - TTT TTA TCT AAC TGC TGC GCC GCC GGG AAA ATA CTG TAC GGT TAG A - 3' |
| sc_DNA <sub>i</sub>  | 5' - AAA ACG ATT CAC GGC TGT ACG ACA T - 3'                             |
| sc_cDNA <sub>i</sub> | 5' - AAA AAT GTC GTA CAG CCG TGA ATC G - 3'                             |
| sc_DNA <sub>a</sub>  | 5' - TTT TAA ATG CGT CTT AGC AAT TAC GGA CAG TAG CAT CAC TTT AGT T - 3' |

**Supplementary Table 2** Types of PRNCs used in this experiment

| Name                  | Details                                          |
|-----------------------|--------------------------------------------------|
| S(+) <i>T</i> (+)P(+) | Sliding (+) / Targeting (+) / <i>i-motif</i> (+) |
| S(+) <i>T</i> (-)P(+) | Sliding (+) / Targeting (-) / <i>i-motif</i> (+) |
| S(-) <i>T</i> (+)P(+) | Sliding (-) / Targeting (+) / <i>i-motif</i> (+) |
| S(-) <i>T</i> (-)P(+) | Sliding (-) / Targeting (-) / <i>i-motif</i> (+) |
| S(+) <i>T</i> (+)P(-) | Sliding (+) / Targeting (+) / <i>i-motif</i> (-) |
| S(+) <i>T</i> (-)P(-) | Sliding (+) / Targeting (-) / <i>i-motif</i> (-) |

**Supplementary Table 3** IC50 values of various DOX loaded PRNCs towards CCRF-CEM and Ramos cells

| Sample                | IC50 value ( $\mu\text{M DOX}$ ) |       |
|-----------------------|----------------------------------|-------|
|                       | CCRF-CEM                         | Ramos |
| Free DOX              | 0.45                             | 1.8   |
| S(+) <i>T</i> (+)P(+) | 0.4                              | 2.4   |
| S(+) <i>T</i> (-)P(+) | 0.57                             | 6.7   |
| S(+) <i>T</i> (+)P(-) | 0.75                             | N/A   |
| S(+) <i>T</i> (-)P(-) | 1.5                              | N/A   |
| S(-) <i>T</i> (+)P(+) | 1.25                             | N/A   |
| S(-) <i>T</i> (-)P(+) | 1.25                             | N/A   |

**Supplementary Table 4** ROI fluorescence mean intensity calculation of microscopic images

| Sample                | DAPI     | AnnexinV | PI      | DAPI to AV | DAPI to PI |
|-----------------------|----------|----------|---------|------------|------------|
| PBS                   | 6352.89  | 496.9    | 802.98  | 8%         | 14%        |
| DOX                   | 11962.05 | 4276.95  | 340.96  | 36%        | 6%         |
| S(+) <i>T</i> (+)P(+) | 5607.61  | 6872.27  | 6938.39 | 123%       | 124%       |
| S(-) <i>T</i> (+)P(+) | 5911.65  | 2893.5   | 650.45  | 49%        | 12%        |
| S(+) <i>T</i> (-)P(+) | 10266.87 | 478.61   | 290.89  | 5%         | 5%         |
| S(-) <i>T</i> (-)P(+) | 3680.74  | 576.46   | 472.95  | 16%        | 8%         |
